# Supplementary material for: tRNA gene content, structure, and organization in the flowering plant lineage
Source: Frontiers journal article supplement (doi:10.3389/fpls.2024.1486612), 2024-12-23

**Supplementary File 3.** Logo plots showing the consensus  
B box sequences.

ANA

## Dicots

## Monocots

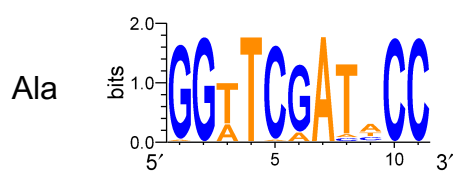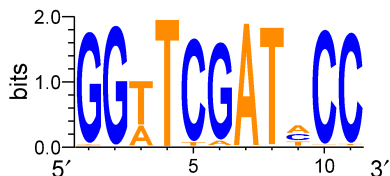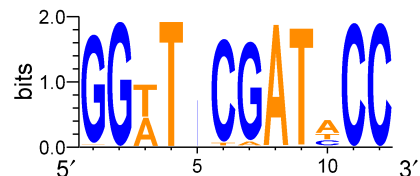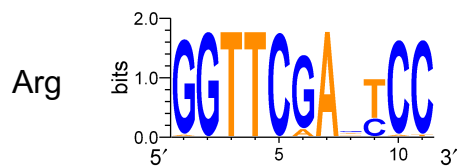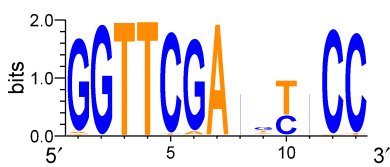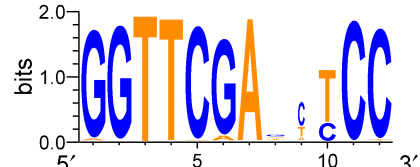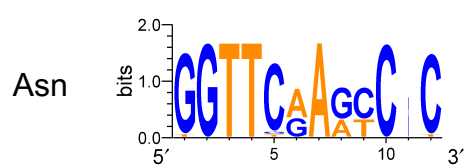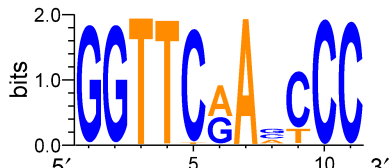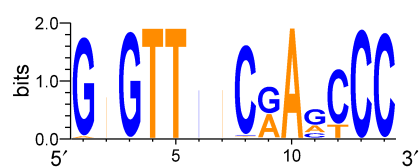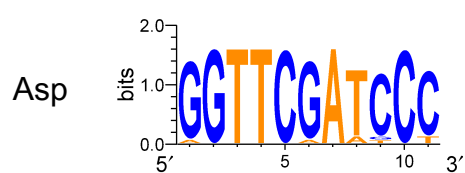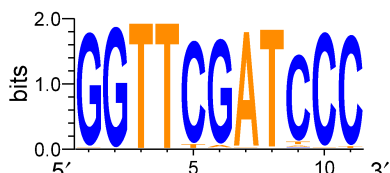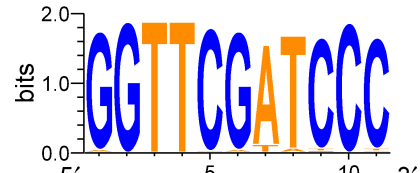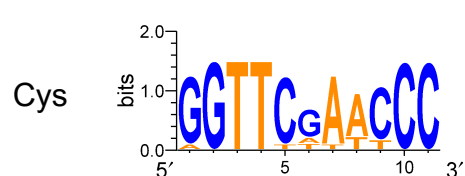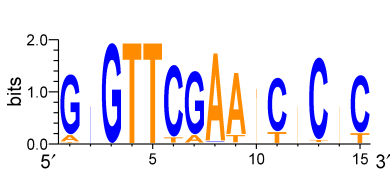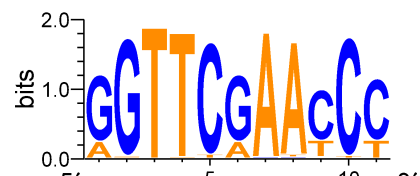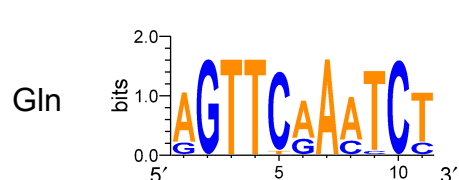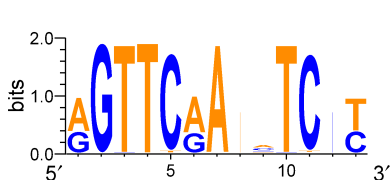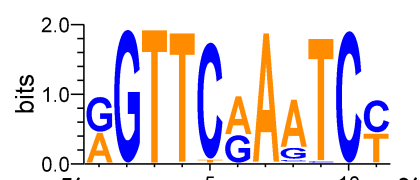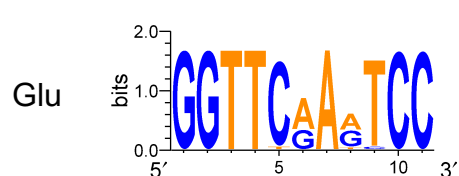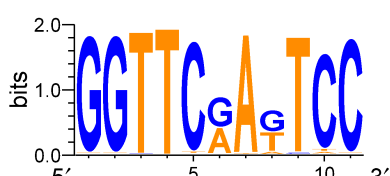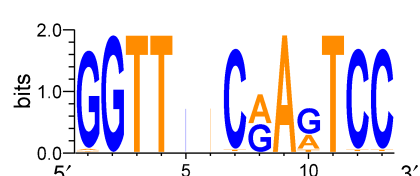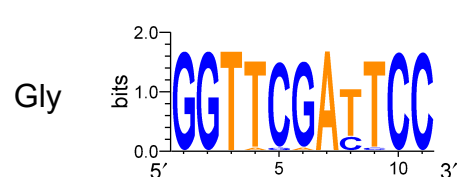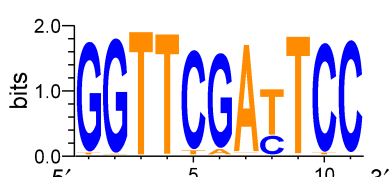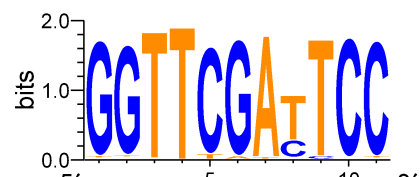

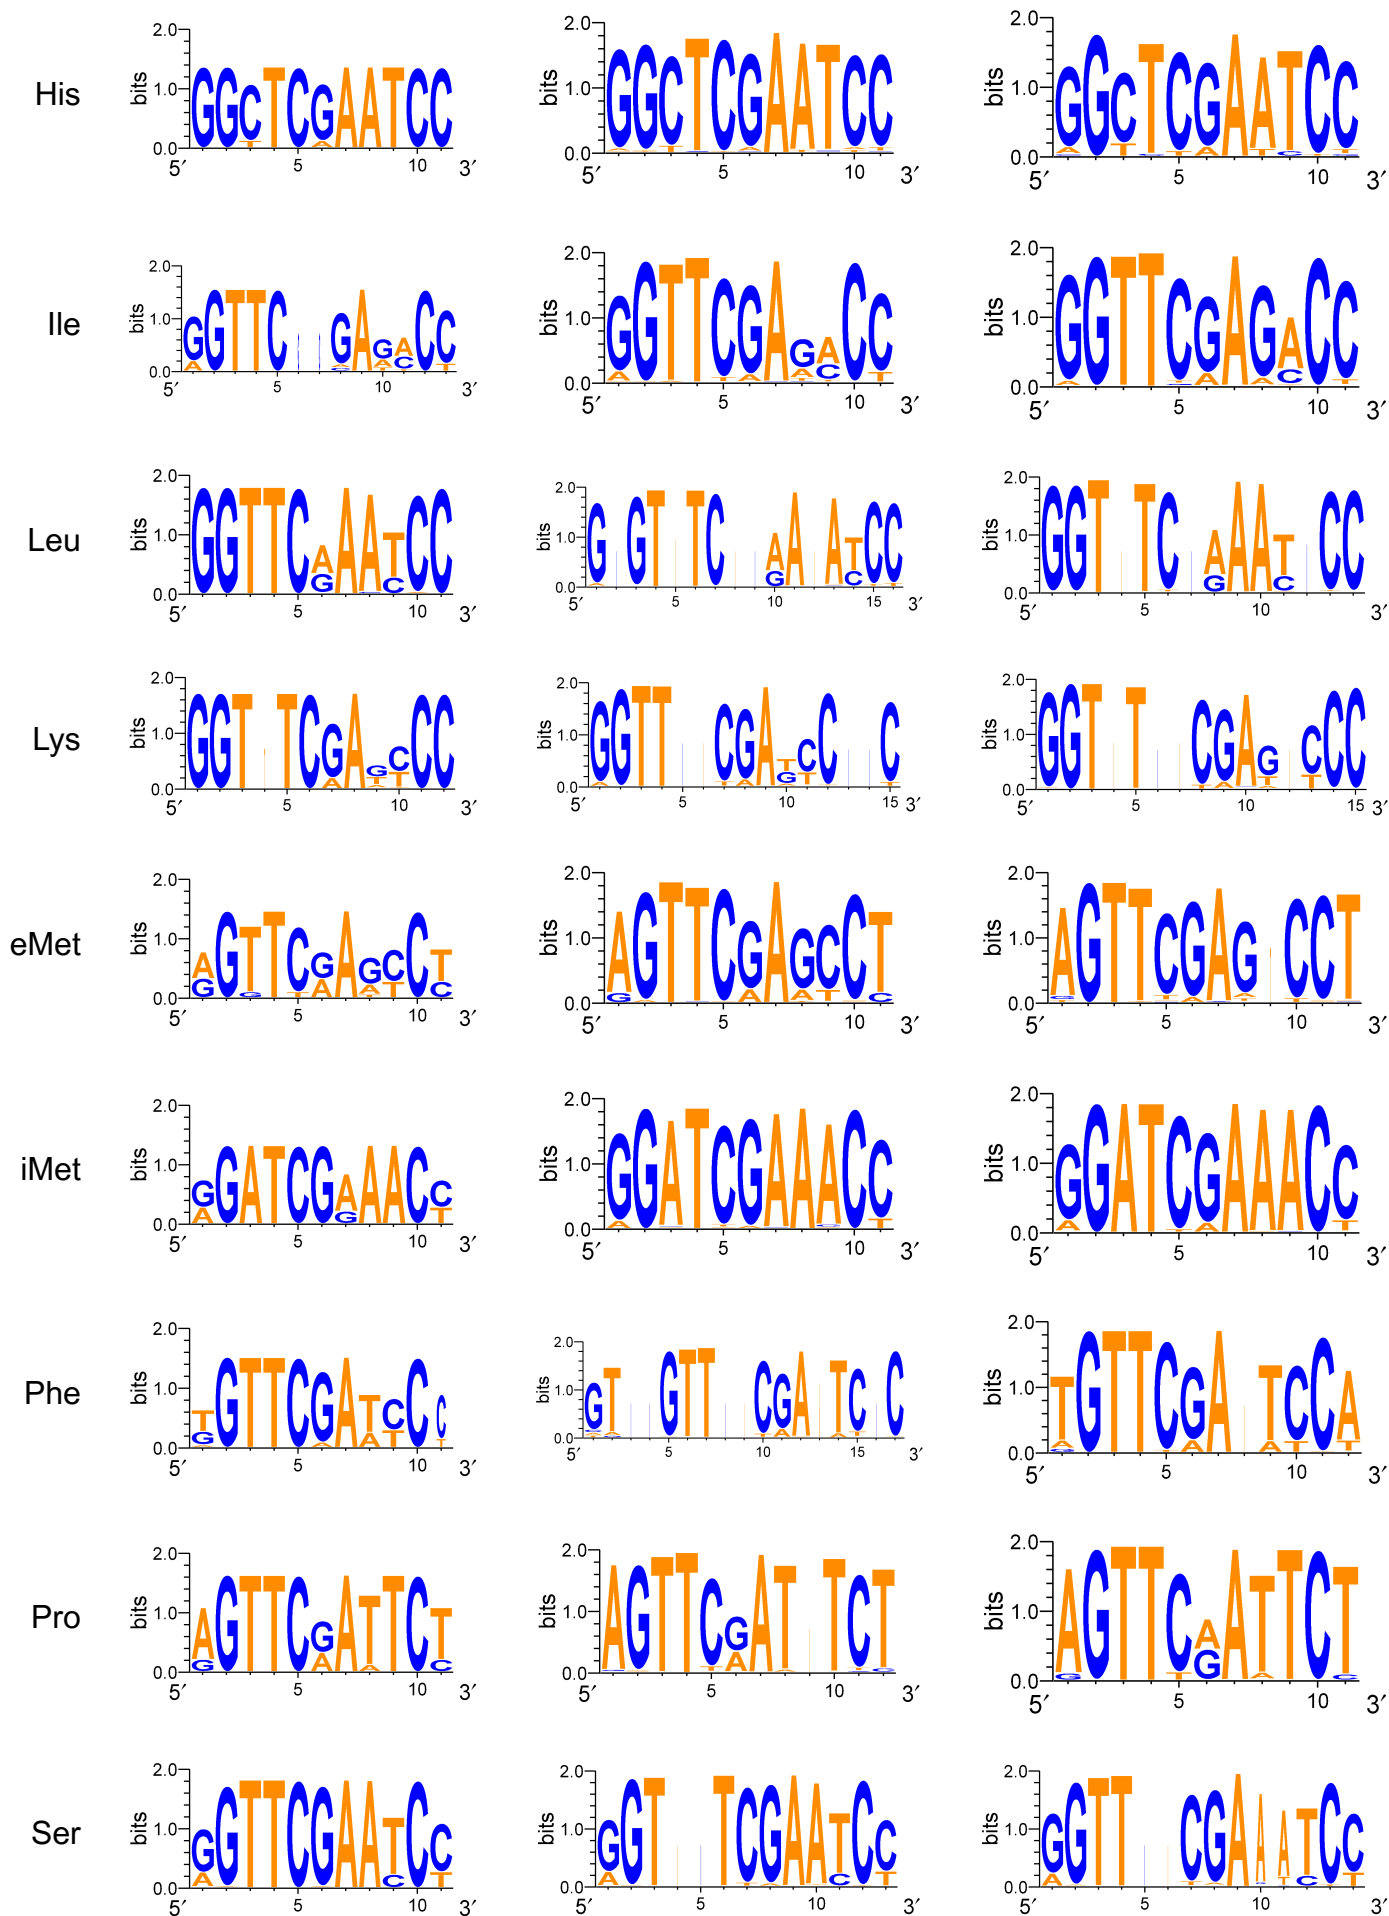

Thr

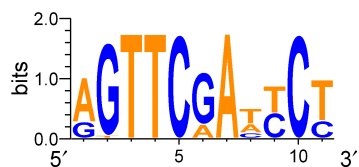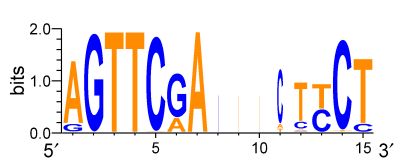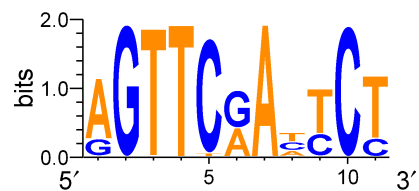

Trp

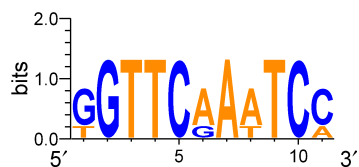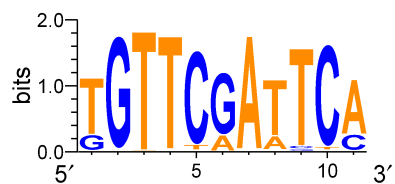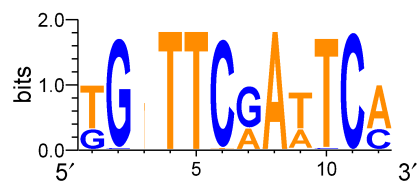

Tyr

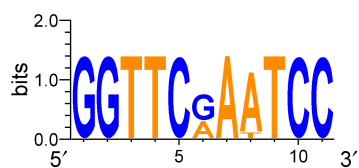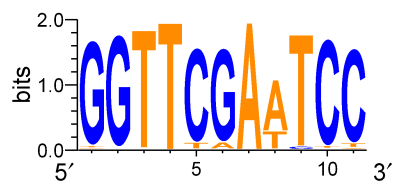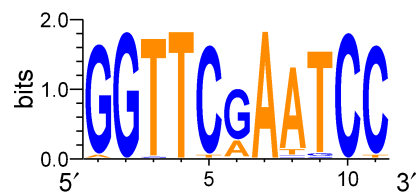

Val

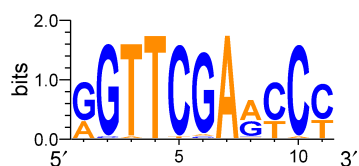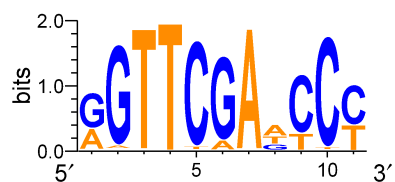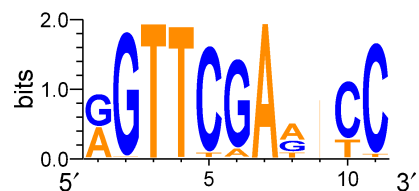

Sup

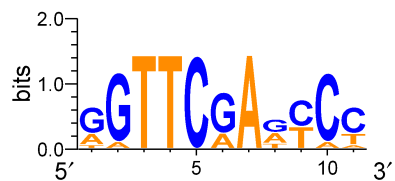

Supplement: Data_Sheet_3.pdf [file Data_Sheet_3.pdf]
